# Supplementary material for: Transcriptional Dynamics Reveal Critical Roles for Non-coding RNAs in the Immediate-Early Response
Source: PubMed Central journal article supplement (PMC4401570; doi:10.1371/journal.pcbi.1004217), 2015-04-17

**hsa-mir-3609**  
chr7:98479316..98479330,+

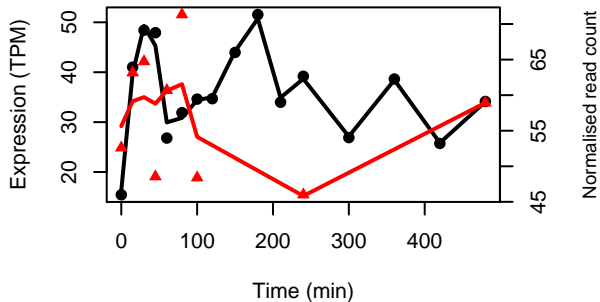

**hsa-mir-4767**  
chrX:7065704..7065770,+

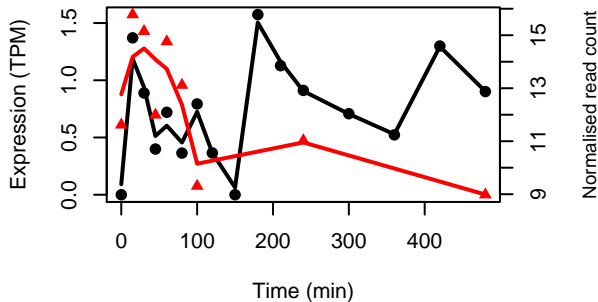

**hsa-mir-4767**  
chrX:7065835..7065908,+

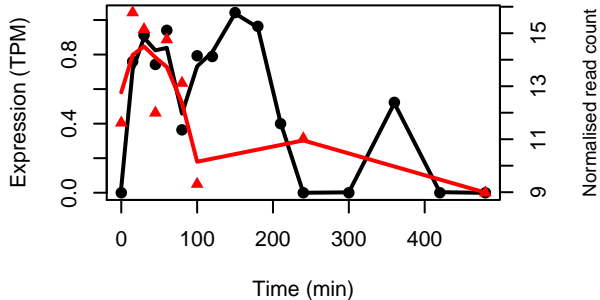

**hsa-mir-3613**  
chr13:50570889..50570906,-

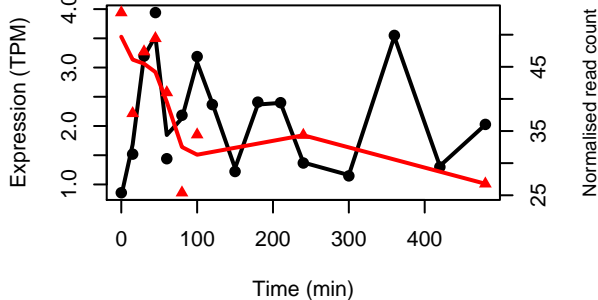

**hsa-mir-1538**  
chr16:69600218..69600268,-

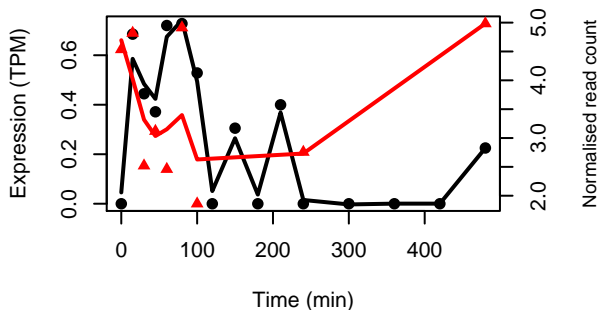

**hsa-let-7i**  
chr12:62997100..62997140,+

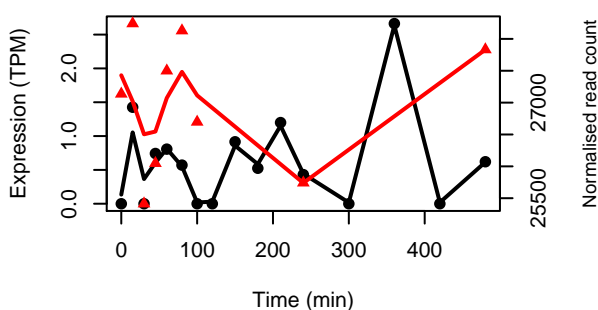

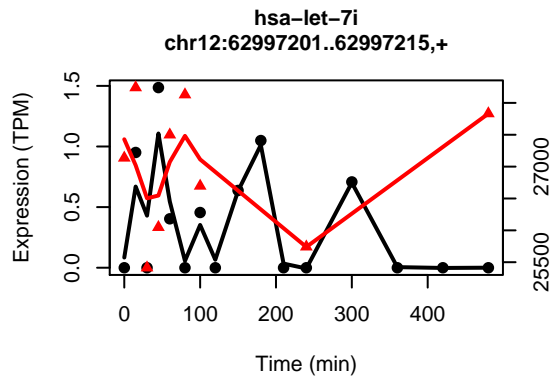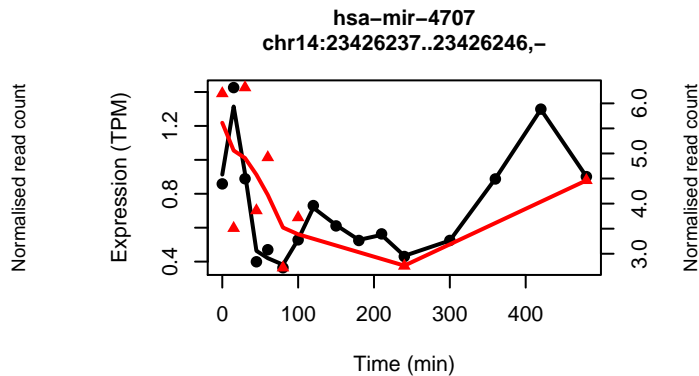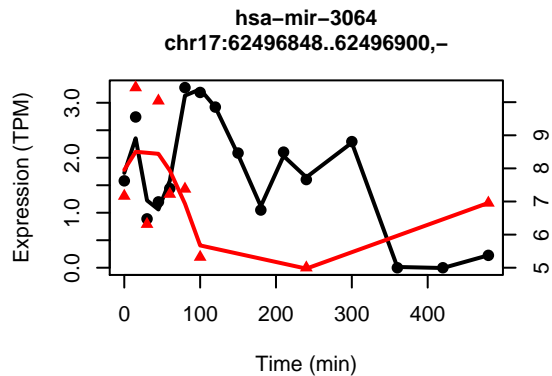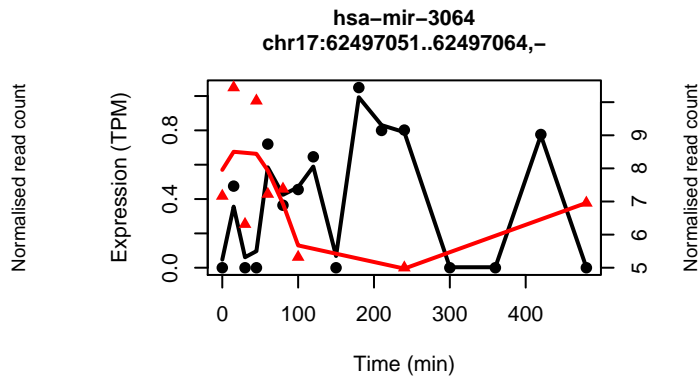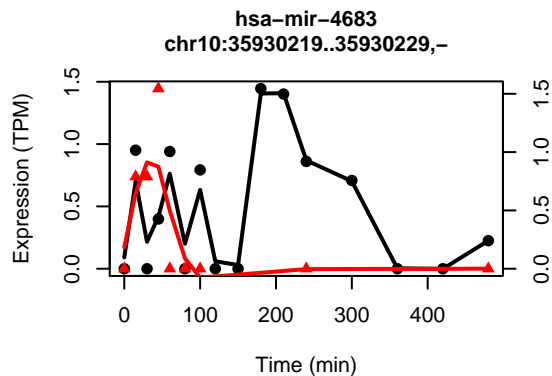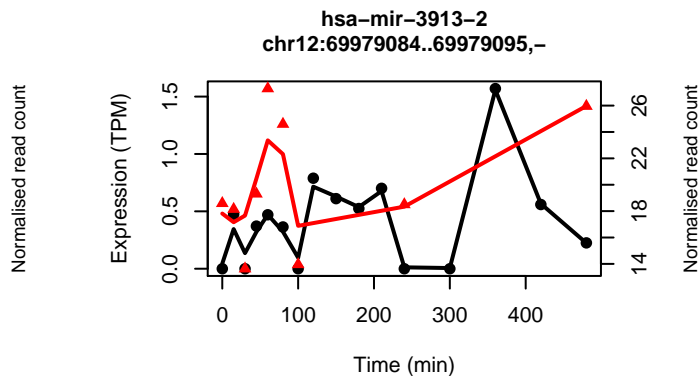

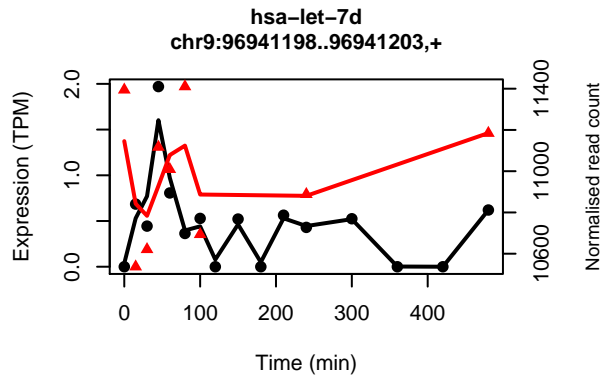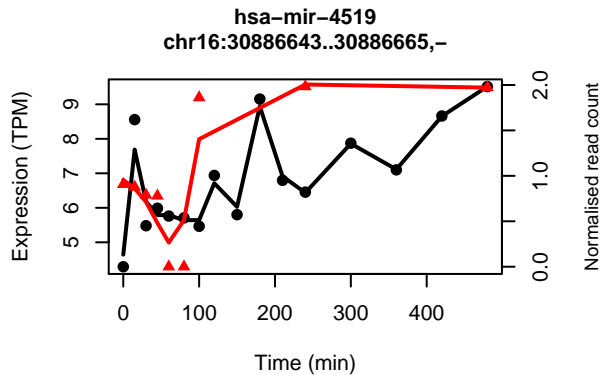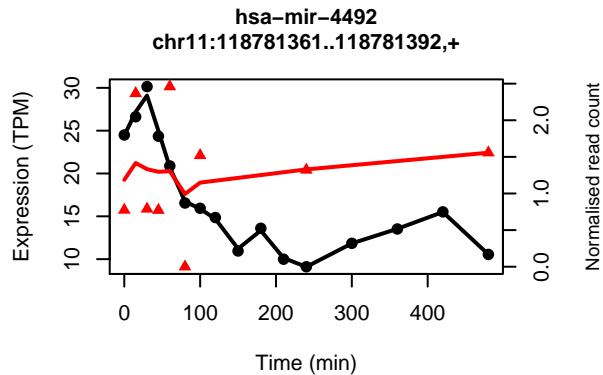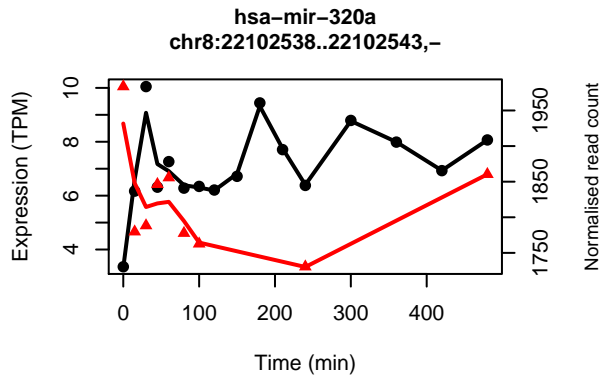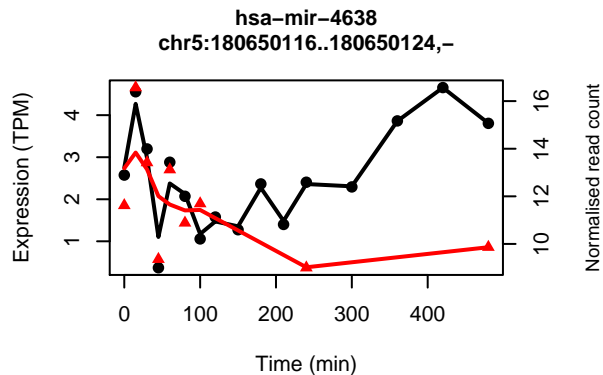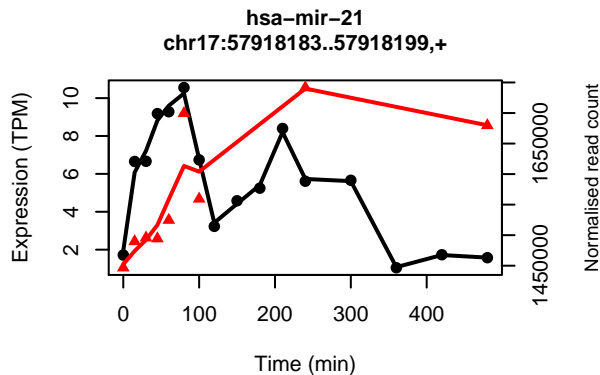

**hsa-mir-21**  
**chr17:57918299..57918329,+**

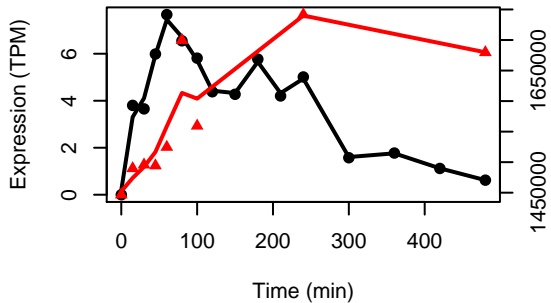

**hsa-mir-21**  
**chr17:57918343..57918368,+**

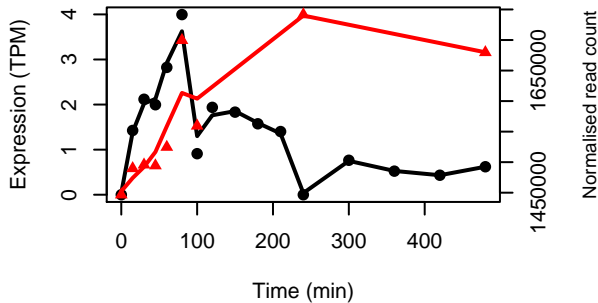

**hsa-mir-21**  
**chr17:57918422..57918461,+**

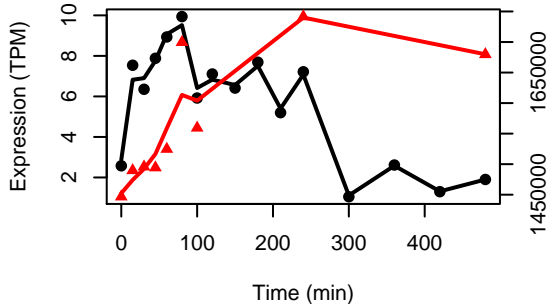

**hsa-mir-21**  
**chr17:57918463..57918513,+**

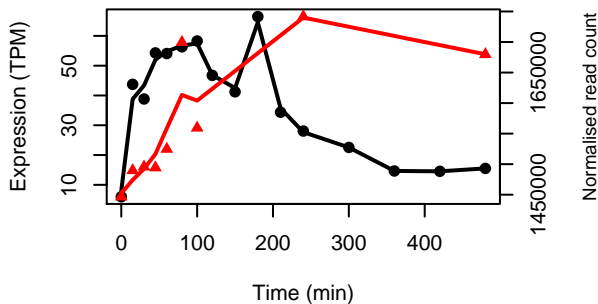

**hsa-mir-21**  
**chr17:57918530..57918541,+**

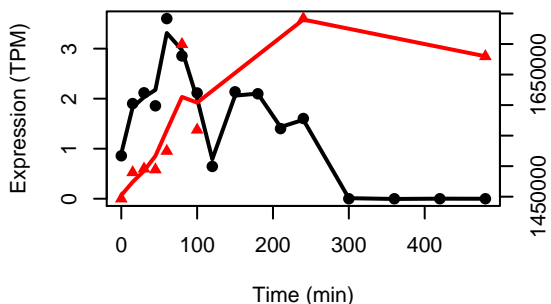

**hsa-mir-21**  
**chr17:57918547..57918564,+**

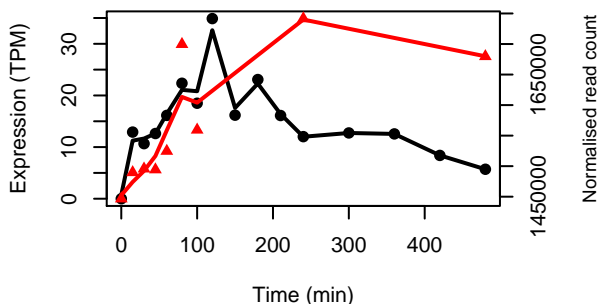

**hsa-mir-4479**  
chr9:139781212..139781241,+

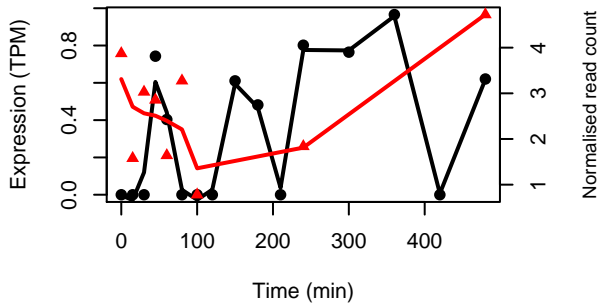

**hsa-mir-3661**  
chr5:133561232..133561244,+

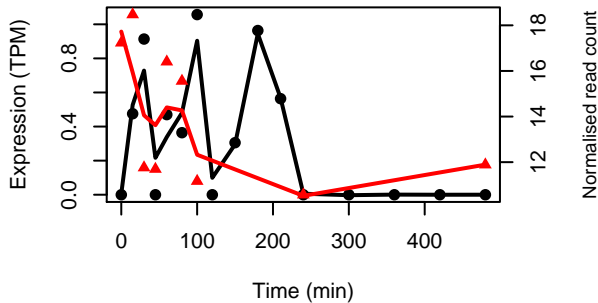

**hsa-mir-3661**  
chr5:133561287..133561304,+

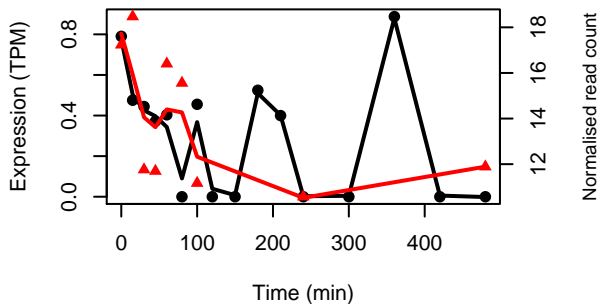

**hsa-mir-760**  
chr1:94312269..94312347,+

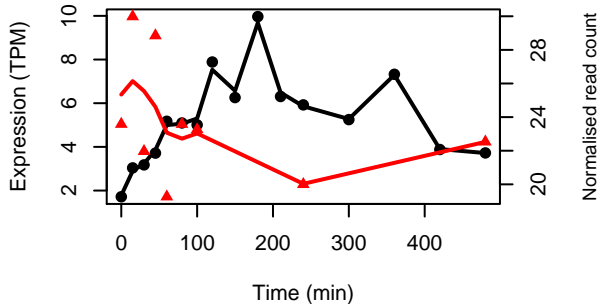

**hsa-mir-30d**  
chr8:135817117..135817122,-

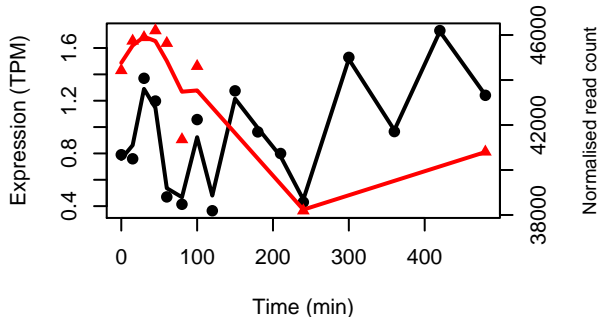

**hsa-mir-3917**  
chr1:26232930..26232945,-

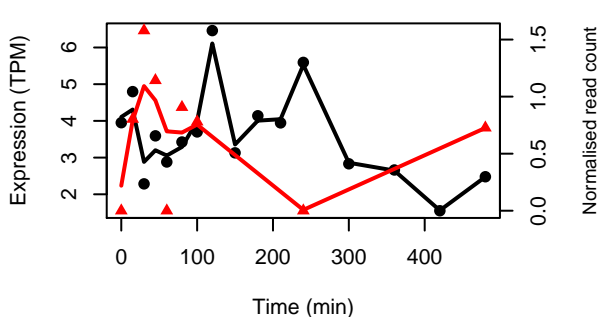

**hsa-mir-4690**  
**chr11:65403830..65403834,+**

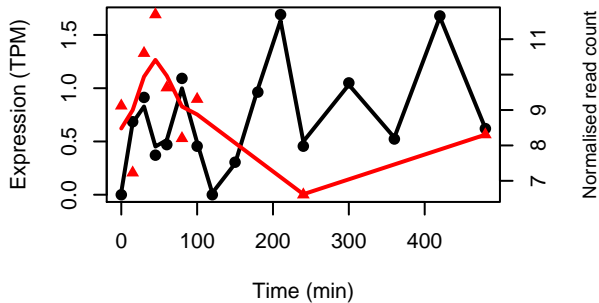

**hsa-mir-4800**  
**chr4:2263777..2263800,-**

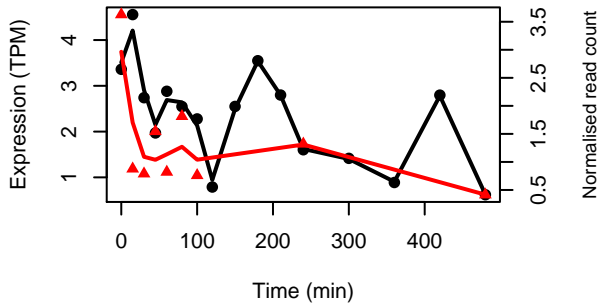

**hsa-mir-4800**  
**chr4:2263809..2263854,-**

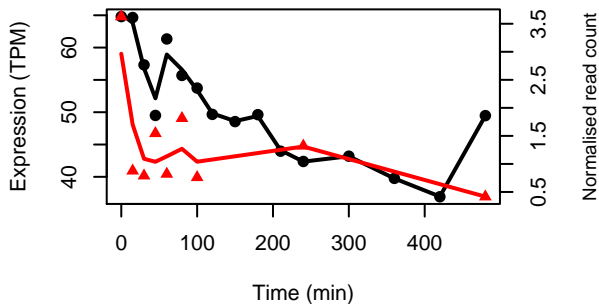

**hsa-mir-4800**  
**chr4:2263861..2263883,-**

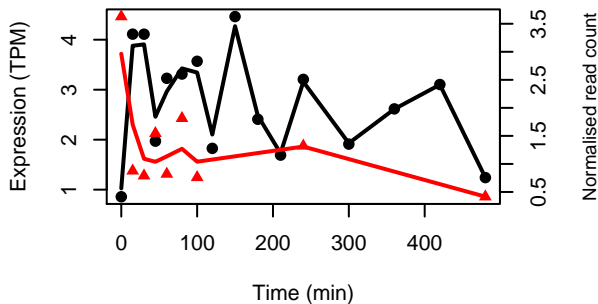

**hsa-mir-222**  
**chrX:45606429..45606443,-**

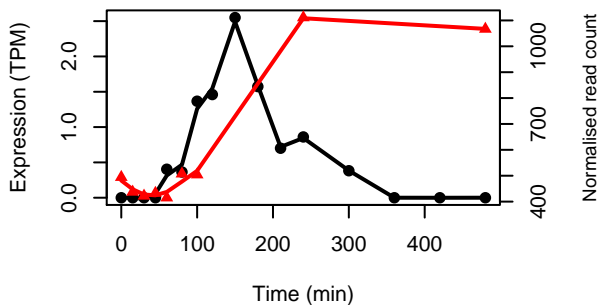

**hsa-mir-4523**  
**chr17:27717346..27717410,+**

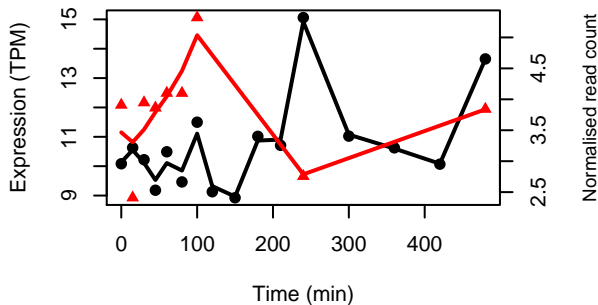

**hsa-mir-4523**  
**chr17:27717415..27717438,+**

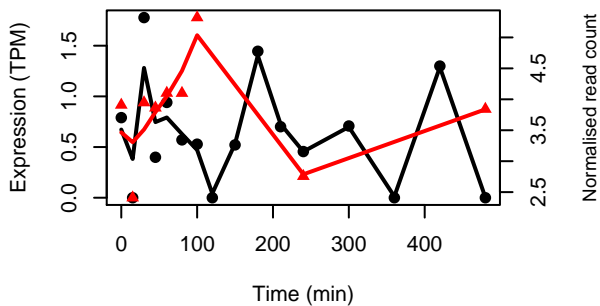

**hsa-mir-3128**  
**chr2:178121224..178121228,-**

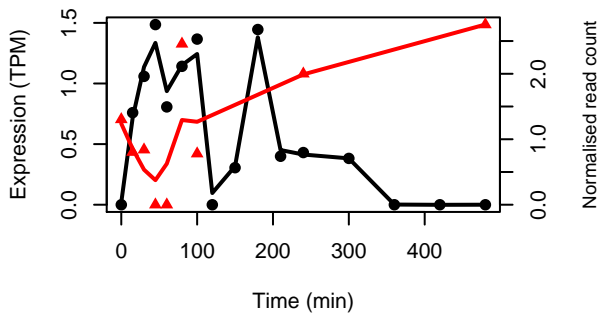

**hsa-mir-4745**  
**chr19:804569..804592,+**

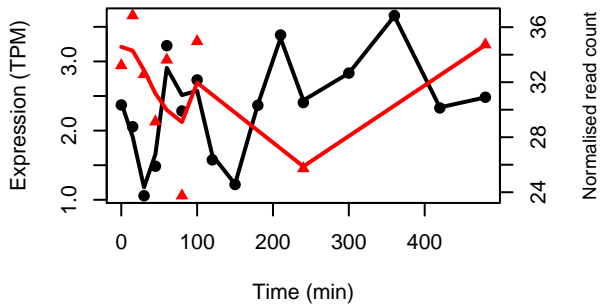

**hsa-mir-4745**  
**chr19:805017..805039,+**

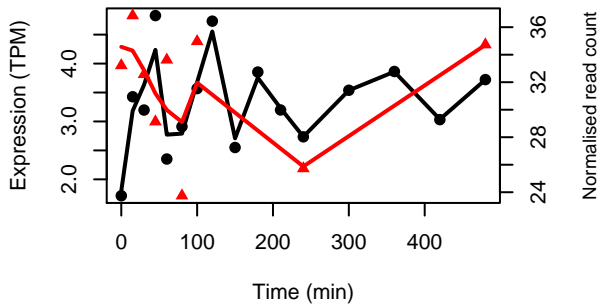

**hsa-let-7e**  
**chr19:52196112..52196115,+**

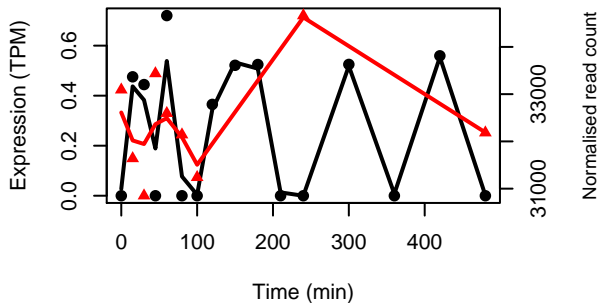

Supplement: pcbi.1004217.s016.pdf [file pcbi.1004217.s016.pdf]
