# Supplementary material for: Transcriptional Dynamics Reveal Critical Roles for Non-coding RNAs in the Immediate-Early Response
Source: PubMed Central journal article supplement (PMC4401570; doi:10.1371/journal.pcbi.1004217), 2015-04-17

**AoSMC-FGF2 (23% assigned)**

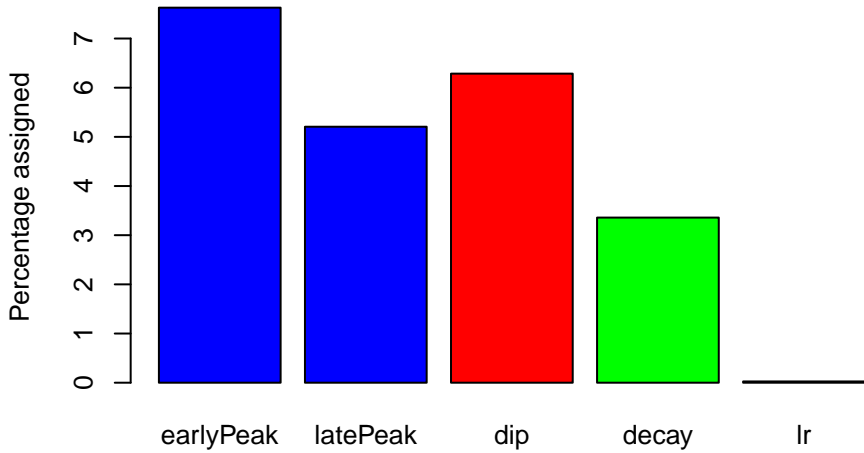

**AoSMC-IL1b (21% assigned)**

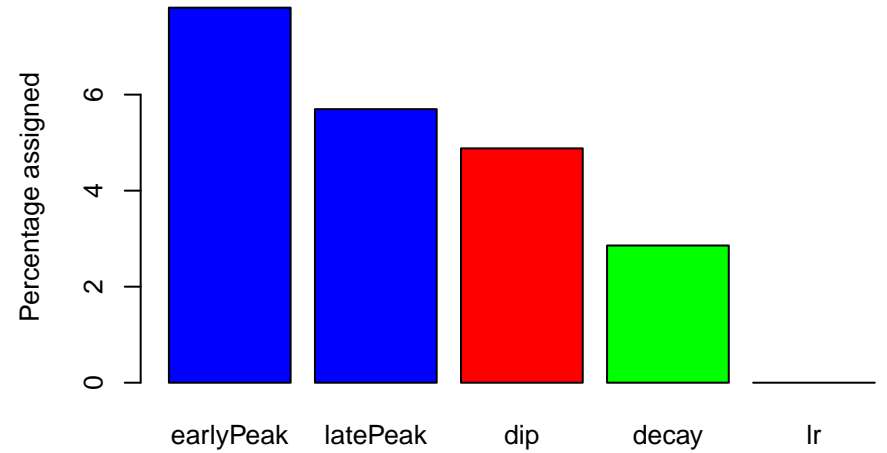

**MCF7-EGF (33% assigned)**

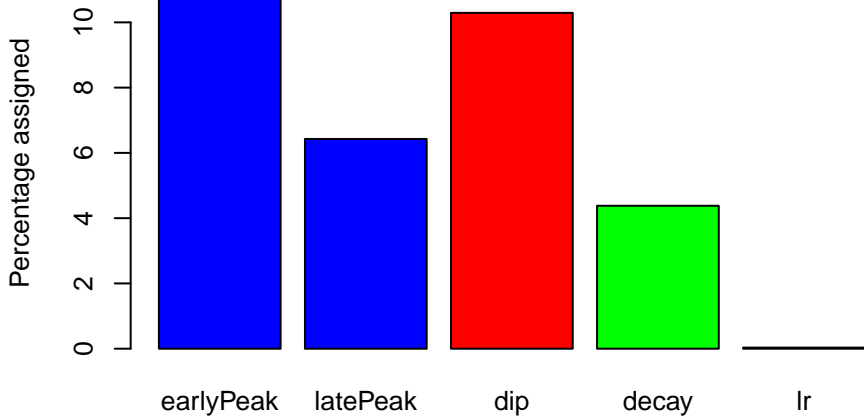

**MCF7-HRG (33% assigned)**

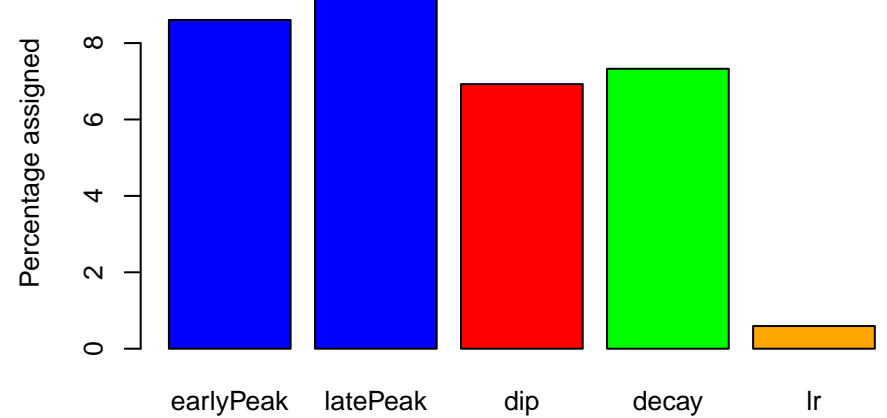

Supplement: pcbi.1004217.s002.pdf [file pcbi.1004217.s002.pdf]
