# Supplementary material for: Transcriptional Dynamics Reveal Critical Roles for Non-coding RNAs in the Immediate-Early Response
Source: PubMed Central journal article supplement (PMC4401570; doi:10.1371/journal.pcbi.1004217), 2015-04-17

**AoSMC-FGF2 (30% assigned)**

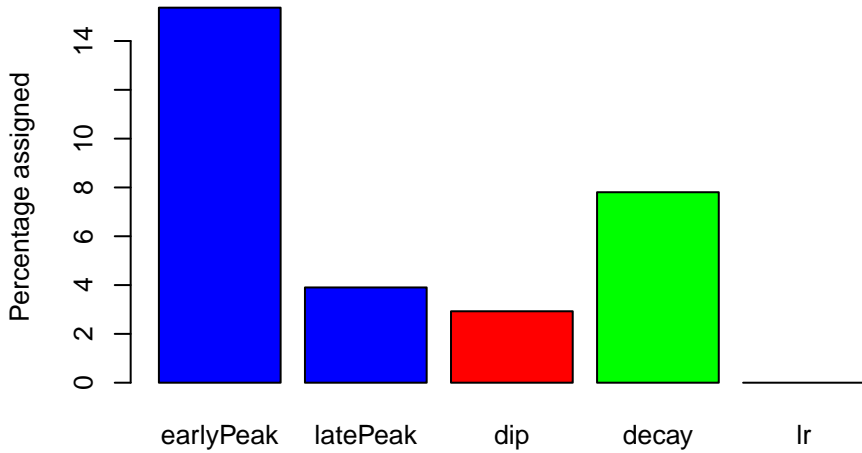

**AoSMC-IL1b (31% assigned)**

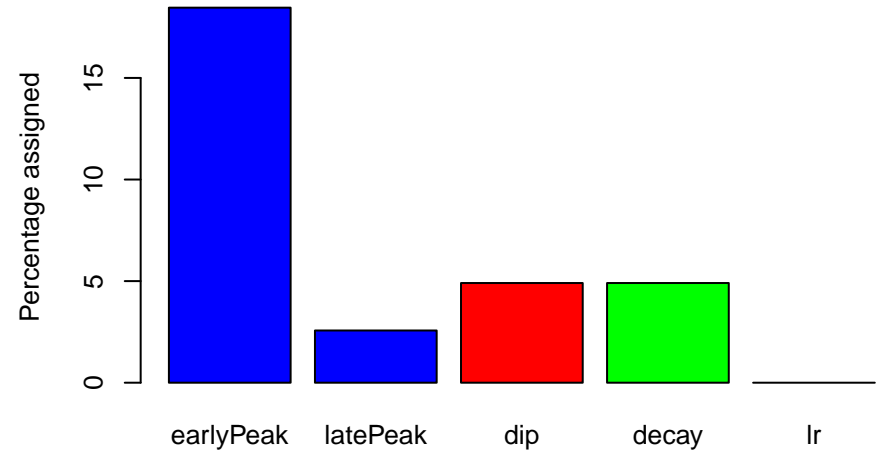

**MCF7-EGF (36% assigned)**

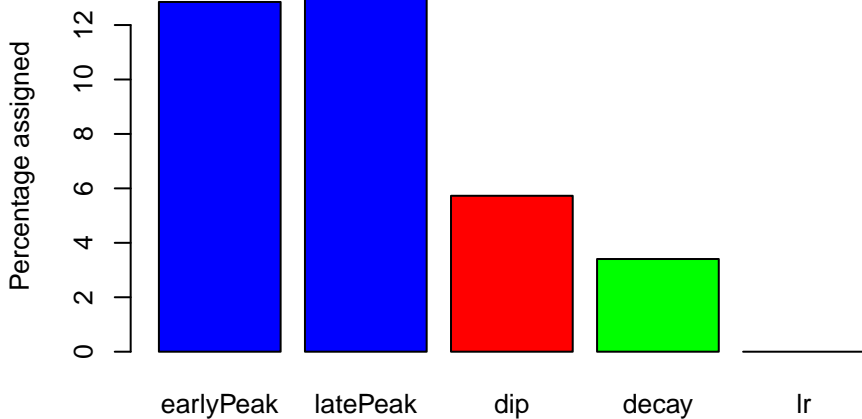

**MCF7-HRG (39% assigned)**

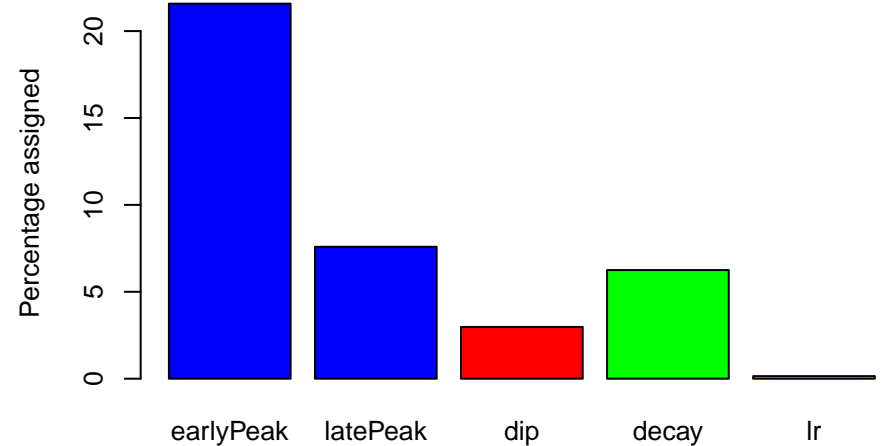

Supplement: pcbi.1004217.s003.pdf [file pcbi.1004217.s003.pdf]
