# Supplementary material for: Transcriptional Dynamics Reveal Critical Roles for Non-coding RNAs in the Immediate-Early Response
Source: PubMed Central journal article supplement (PMC4401570; doi:10.1371/journal.pcbi.1004217), 2015-04-17

**LZIC MCF7-HRG [NODECISION]**

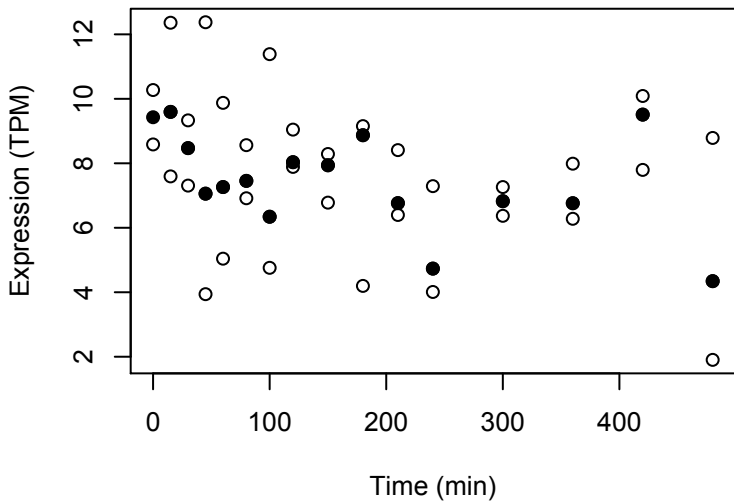

**ATP1B1 MCF7-HRG [latePeak]**

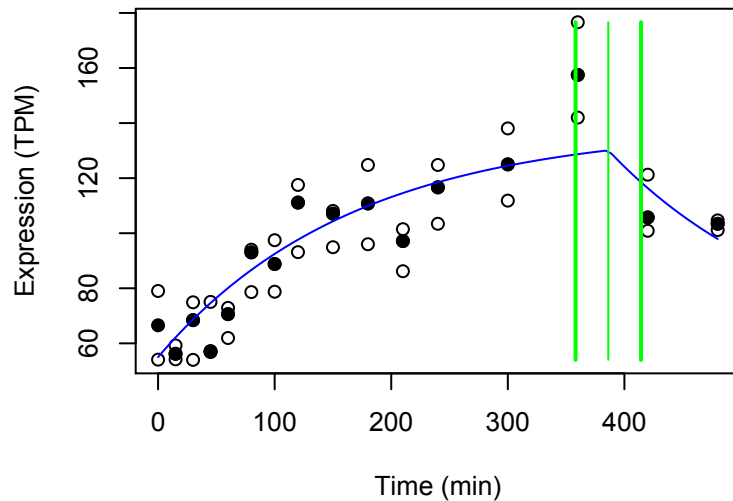

**CEPT1 MCF7-HRG [dip]**

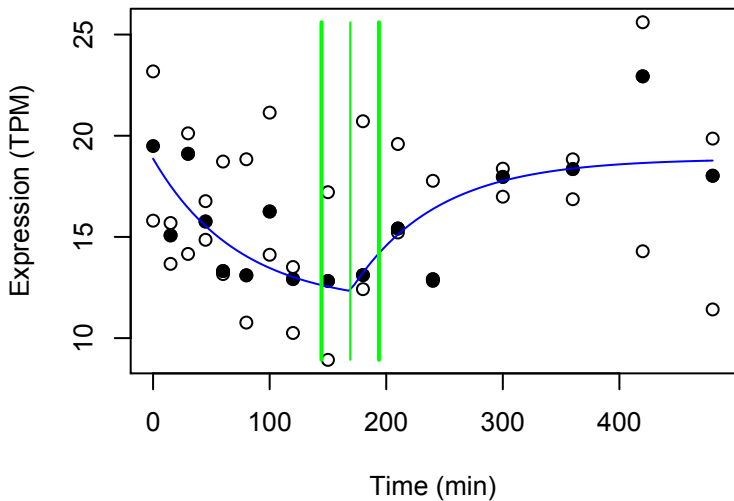

**EXOSC10 MCF7-HRG [decay]**

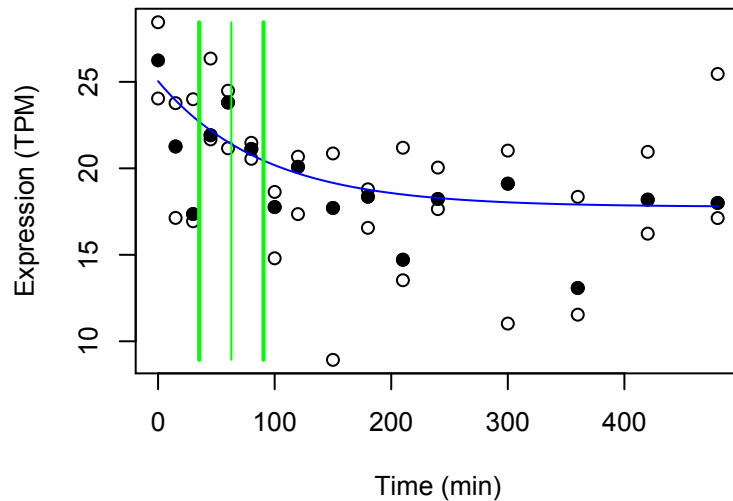

Supplement: pcbi.1004217.s004.pdf [file pcbi.1004217.s004.pdf]
