# Supplementary material for: Transcriptional Dynamics Reveal Critical Roles for Non-coding RNAs in the Immediate-Early Response
Source: PubMed Central journal article supplement (PMC4401570; doi:10.1371/journal.pcbi.1004217), 2015-04-17

**JUN AoSMC-IL1b [earlyPeak]**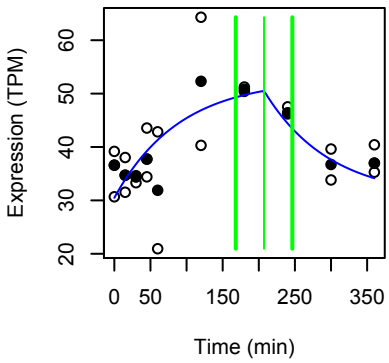**JUN MCF7-EGF [earlyPeak]**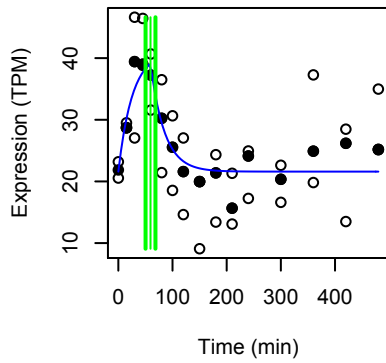**JUN MCF7-HRG [earlyPeak]**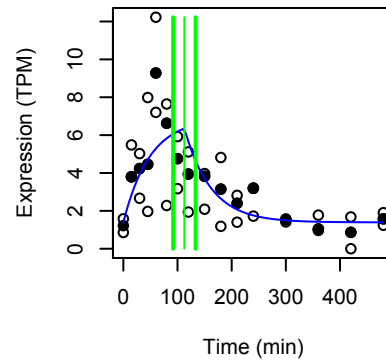**FOS AoSMC-FGF2 [earlyPeak]**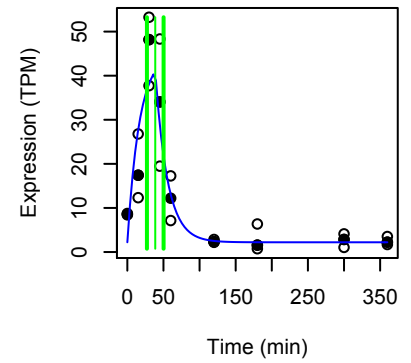**FOS MCF7-EGF [earlyPeak]**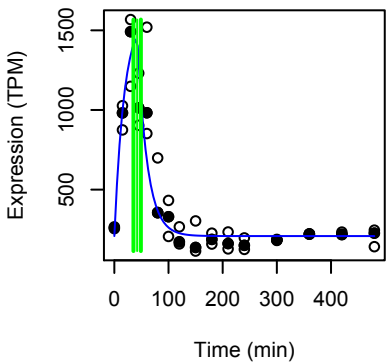**FOS MCF7-HRG [earlyPeak]**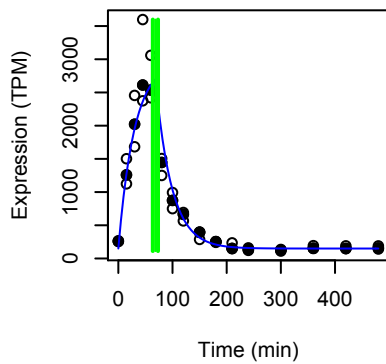**EGR1 AoSMC-FGF2 [earlyPeak]**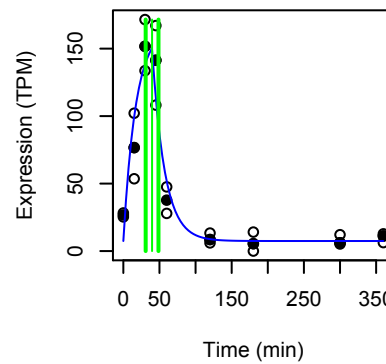**EGR1 AoSMC-IL1b [earlyPeak]**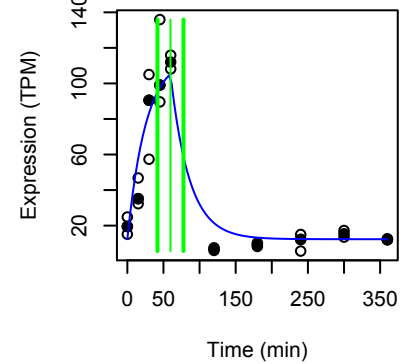**EGR1 MCF7-HRG [earlyPeak]**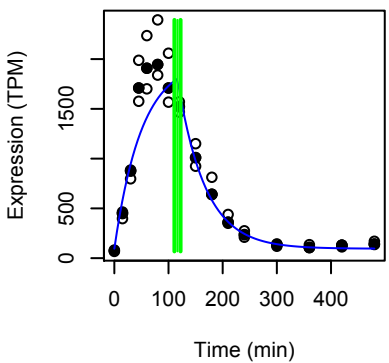**DUSP1 AoSMC-FGF2 [earlyPeak]**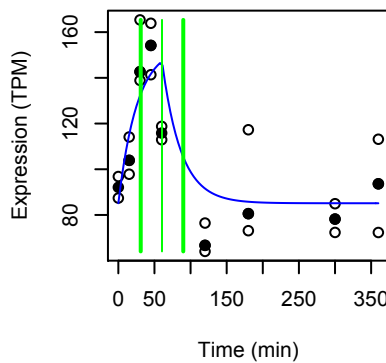**DUSP1 AoSMC-IL1b [earlyPeak]**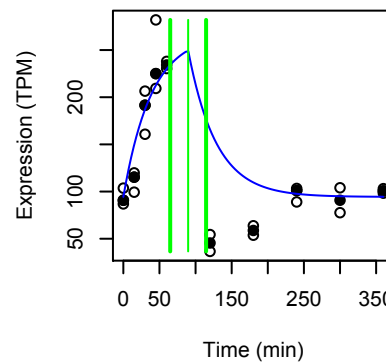**DUSP1 MCF7-EGF [earlyPeak]**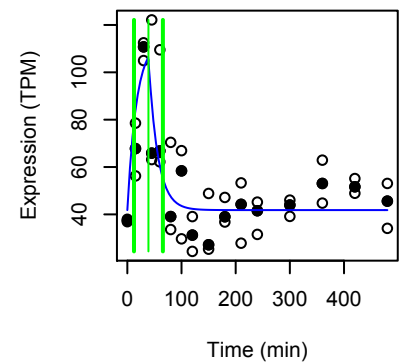

Supplement: pcbi.1004217.s006.pdf [file pcbi.1004217.s006.pdf]
