# Supplementary material for: Transcriptional Dynamics Reveal Critical Roles for Non-coding RNAs in the Immediate-Early Response
Source: PubMed Central journal article supplement (PMC4401570; doi:10.1371/journal.pcbi.1004217), 2015-04-17
Supplement: pcbi.1004217.s007.pdf [file pcbi.1004217.s007.pdf]

REVIGO Gene Ontology treemap

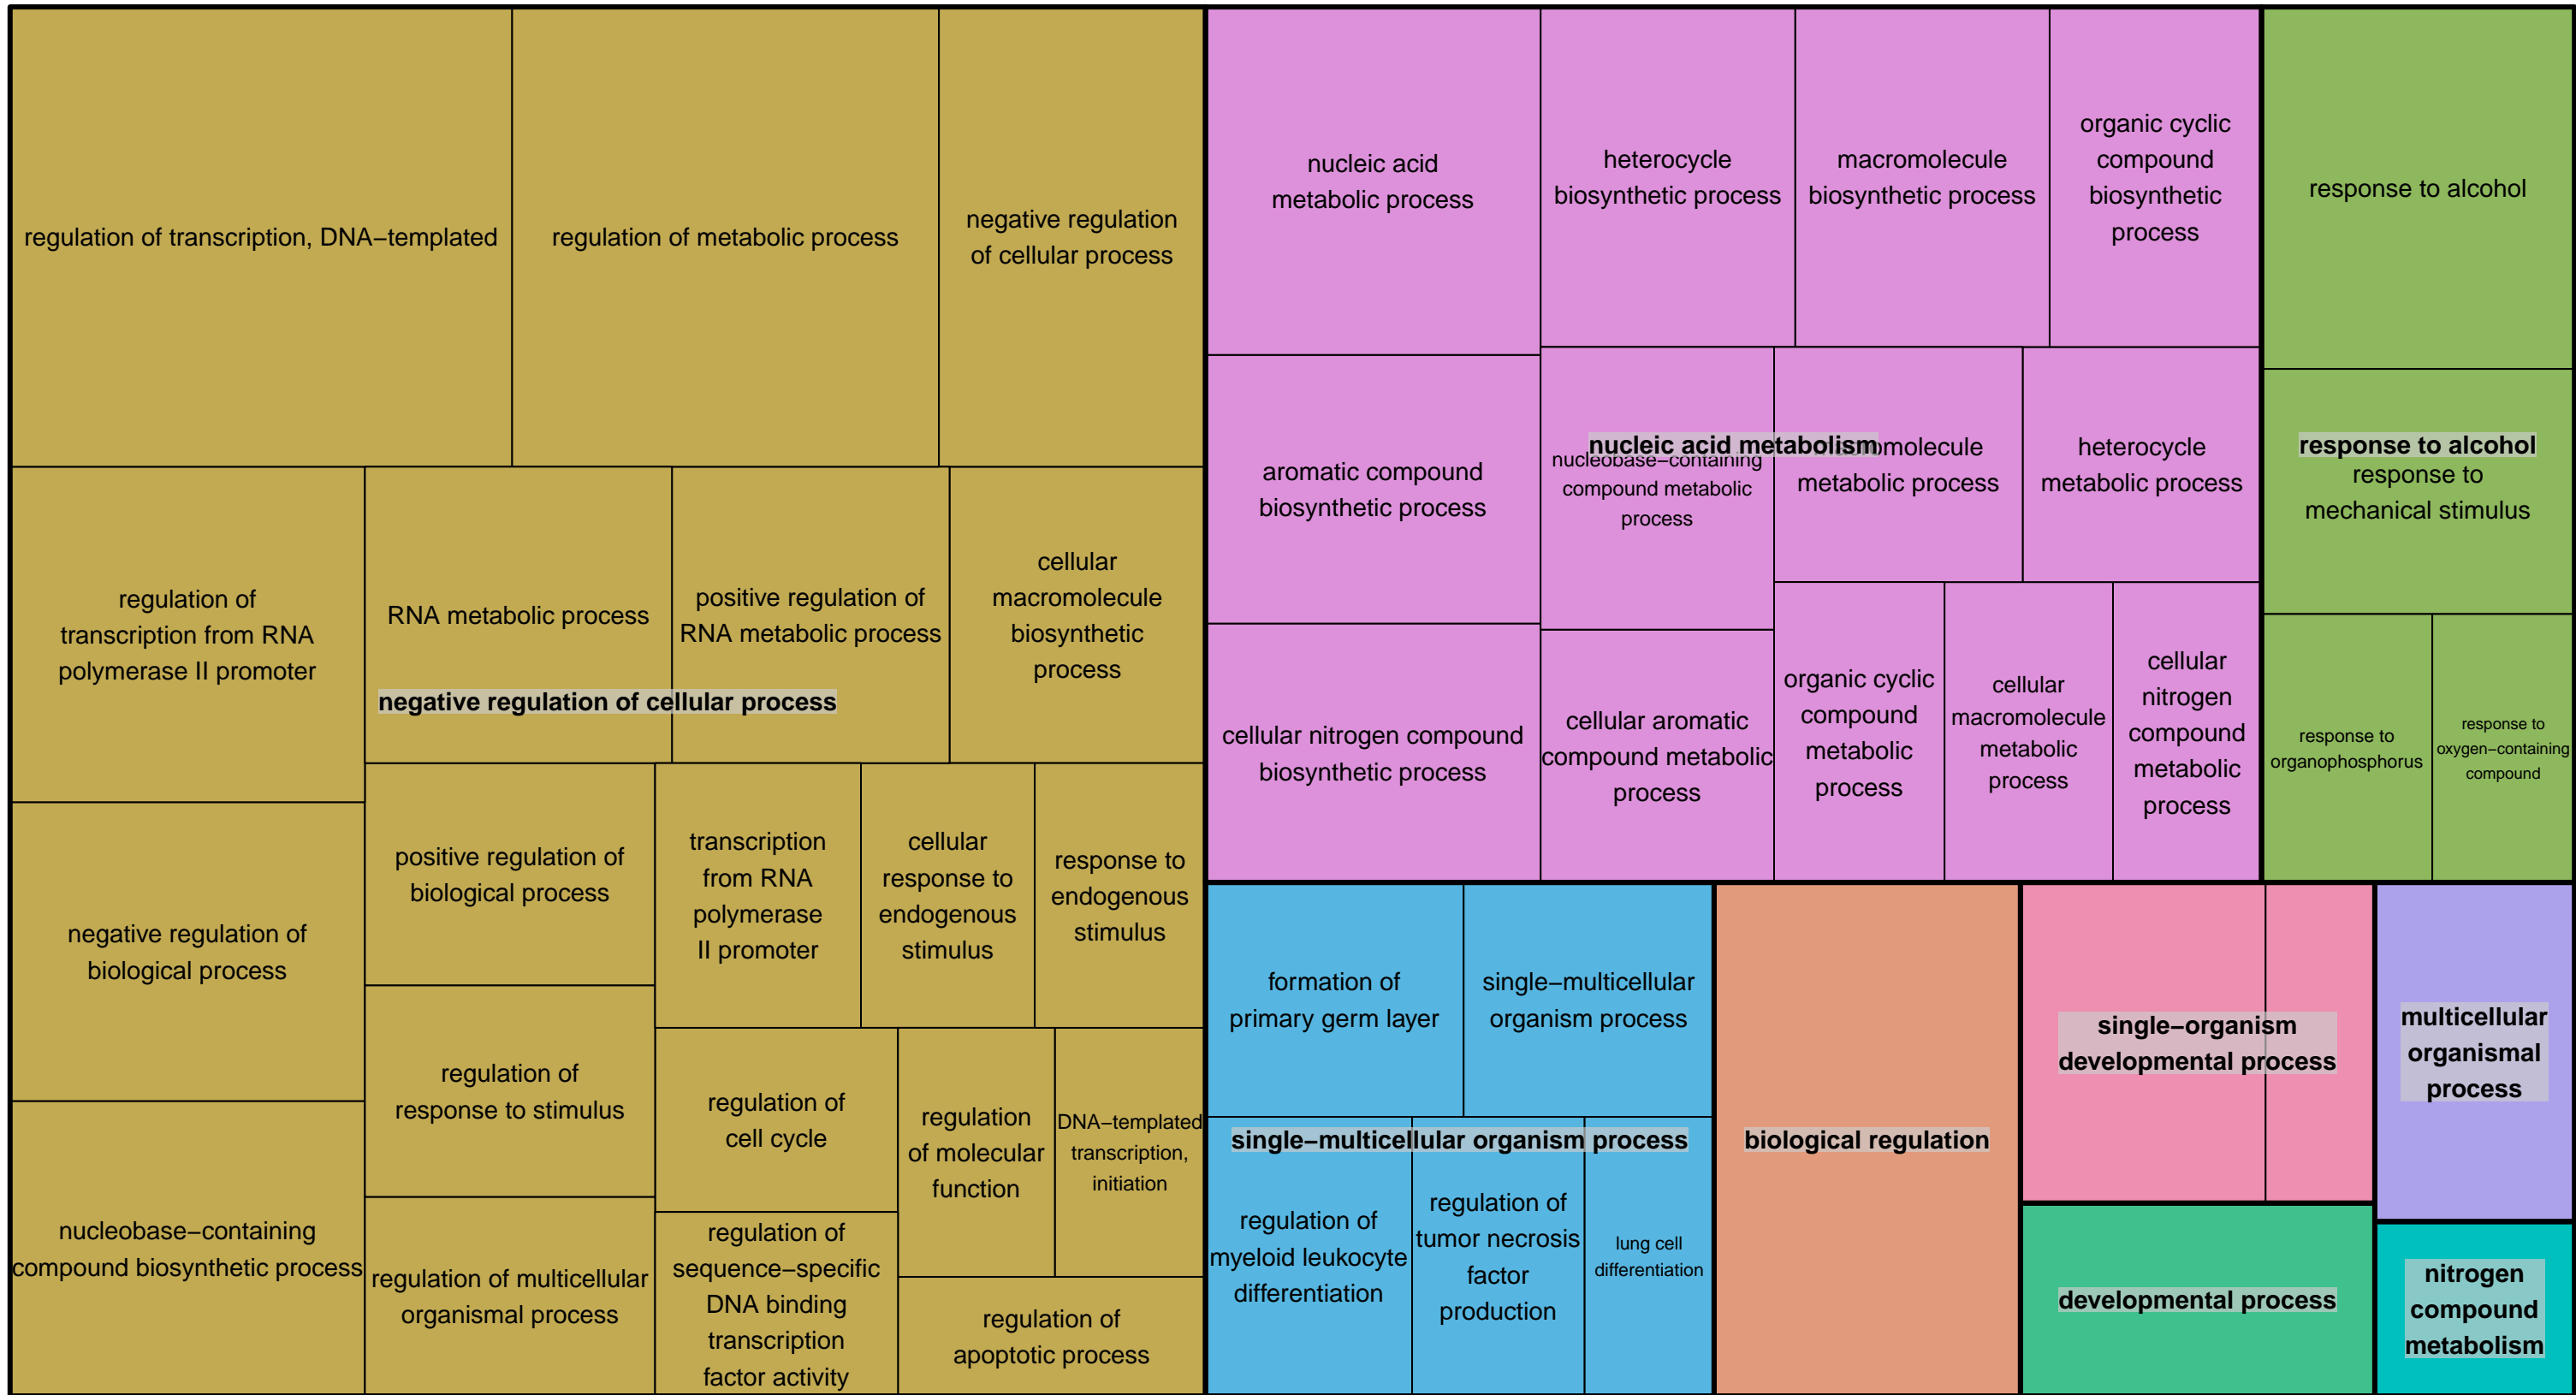

regulation of transcription, DNA-templated

regulation of metabolic process

negative regulation of cellular process

nucleic acid metabolic process

heterocycle biosynthetic process

macromolecule biosynthetic process

organic cyclic compound biosynthetic process

response to alcohol

regulation of transcription from RNA polymerase II promoter

RNA metabolic process

positive regulation of RNA metabolic process

cellular macromolecule biosynthetic process

**negative regulation of cellular process**

aromatic compound biosynthetic process

nucleobase-containing compound metabolic process

nucleic acid metabolism molecule metabolic process

heterocycle metabolic process

**response to alcohol**  
response to mechanical stimulus

cellular nitrogen compound biosynthetic process

cellular aromatic compound metabolic process

organic cyclic compound metabolic process

cellular macromolecule metabolic process

cellular nitrogen compound metabolic process

response to organophosphorus

response to oxygen-containing compound

negative regulation of biological process

positive regulation of biological process

transcription from RNA polymerase II promoter

cellular response to endogenous stimulus

response to endogenous stimulus

formation of primary germ layer

single-multicellular organism process

**biological regulation**

**single-organism developmental process**

**multicellular organismal process**

nucleobase-containing compound biosynthetic process

regulation of multicellular organismal process

regulation of cell cycle

regulation of molecular function

DNA-templated transcription, initiation

single-multicellular organism process  
regulation of myeloid leukocyte differentiation

regulation of tumor necrosis factor production

lung cell differentiation

**developmental process**

**nitrogen compound metabolism**
