# Supplementary material for: Transcriptional Dynamics Reveal Critical Roles for Non-coding RNAs in the Immediate-Early Response
Source: PubMed Central journal article supplement (PMC4401570; doi:10.1371/journal.pcbi.1004217), 2015-04-17

**Early peak**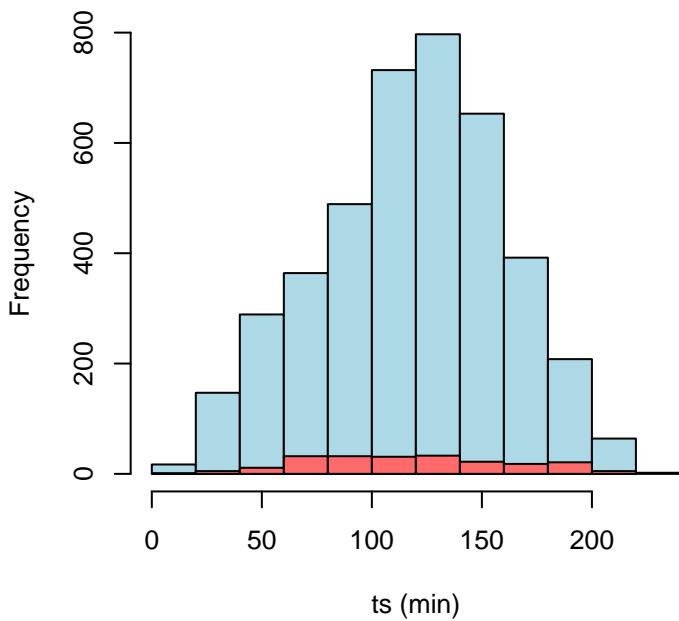**Late peak**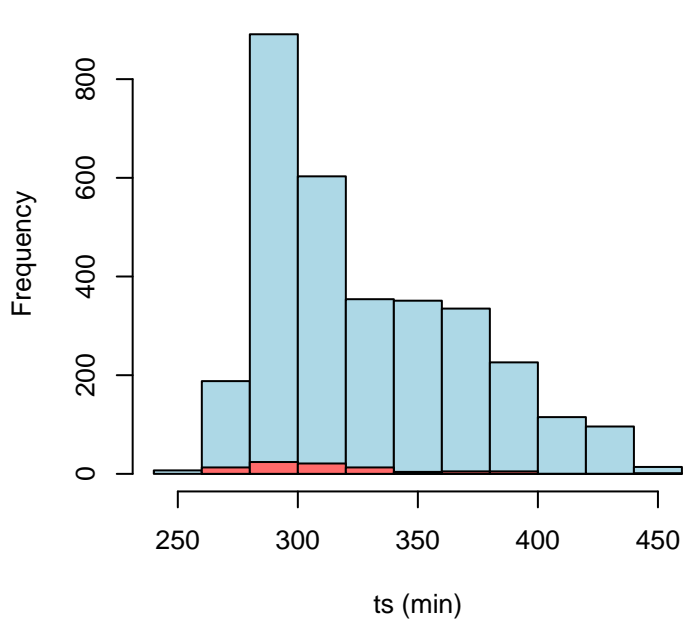**Dip**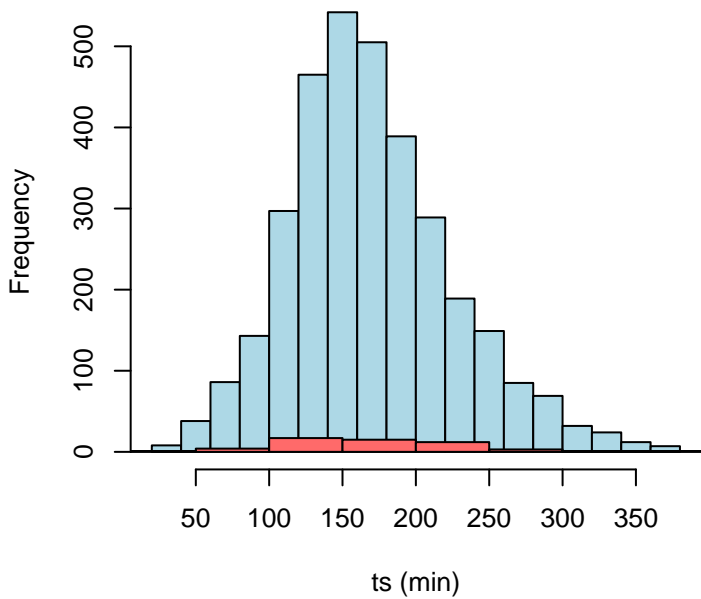**Decay**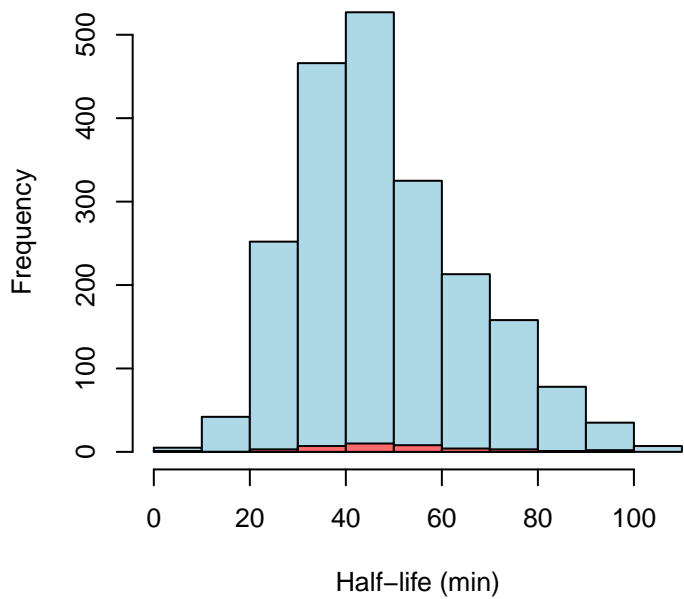

Supplement: pcbi.1004217.s008.pdf [file pcbi.1004217.s008.pdf]
