# Supplementary material for: Transcriptional Dynamics Reveal Critical Roles for Non-coding RNAs in the Immediate-Early Response
Source: PubMed Central journal article supplement (PMC4401570; doi:10.1371/journal.pcbi.1004217), 2015-04-17
Supplement: pcbi.1004217.s009.pdf [file pcbi.1004217.s009.pdf]

A

## AoSMC-FGF2 protein-coding genes

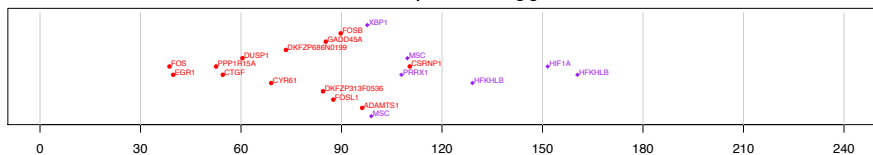

## AoSMC-IL1b protein-coding genes

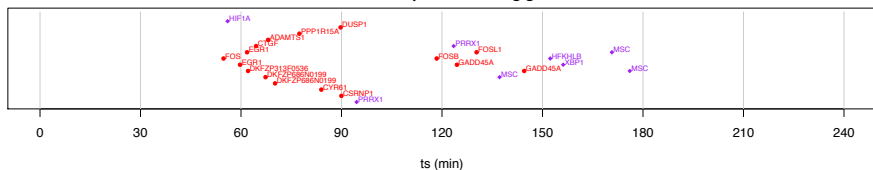

ts (min)

B

## MCF7-EGF RNA genes

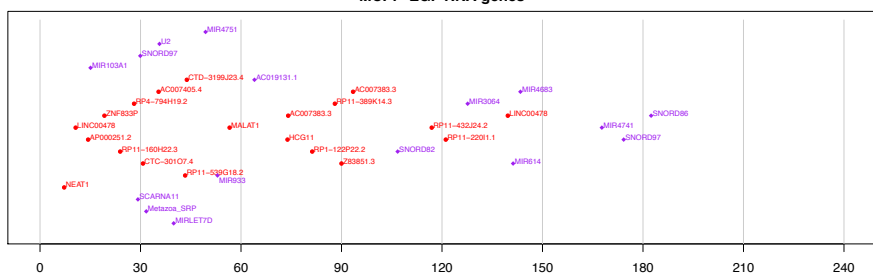

## MCF7-HRG RNA genes

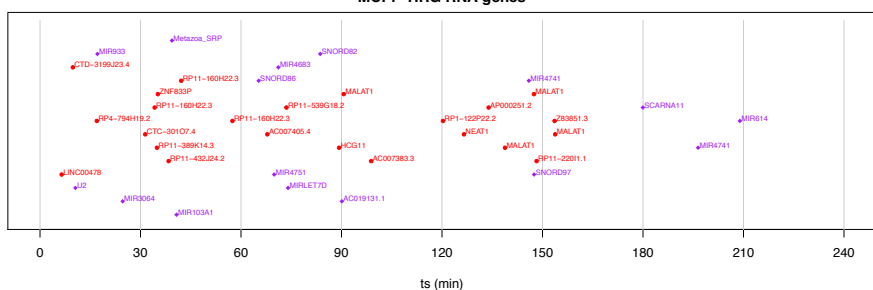

ts (min)

C

## AoSMC-FGF2 RNA genes

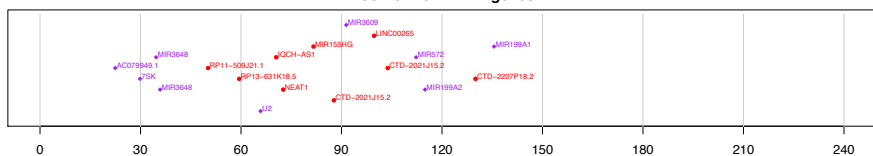

## AoSMC-IL1b RNA genes

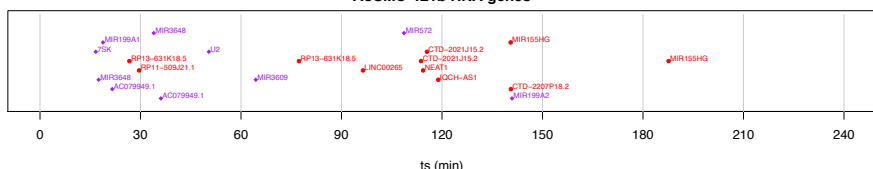

ts (min)
