# Supplementary material for: Transcriptional Dynamics Reveal Critical Roles for Non-coding RNAs in the Immediate-Early Response
Source: PubMed Central journal article supplement (PMC4401570; doi:10.1371/journal.pcbi.1004217), 2015-04-17

**NEAT1 AoSMC-FGF2 [earlyPeak]**

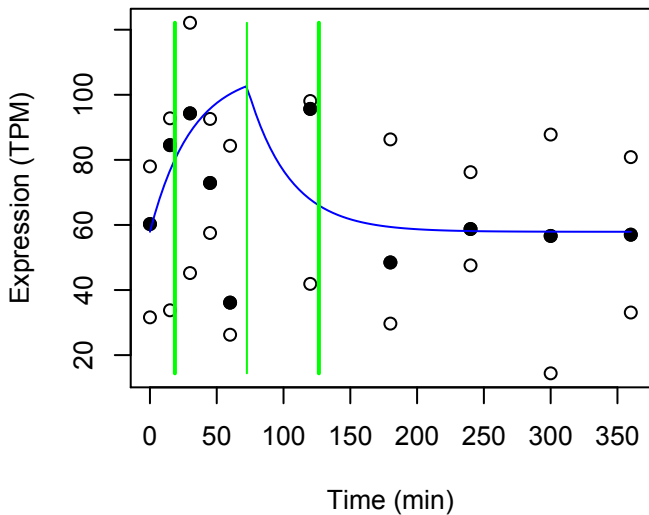

**NEAT1 AoSMC-IL1b [earlyPeak]**

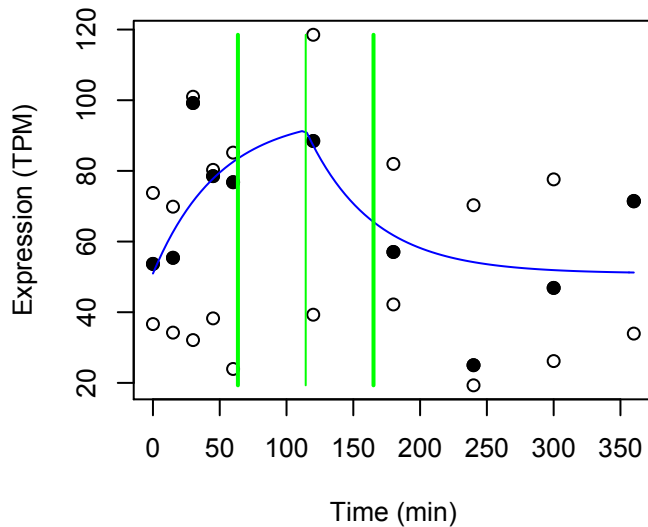

**NEAT1 MCF7-EGF [earlyPeak]**

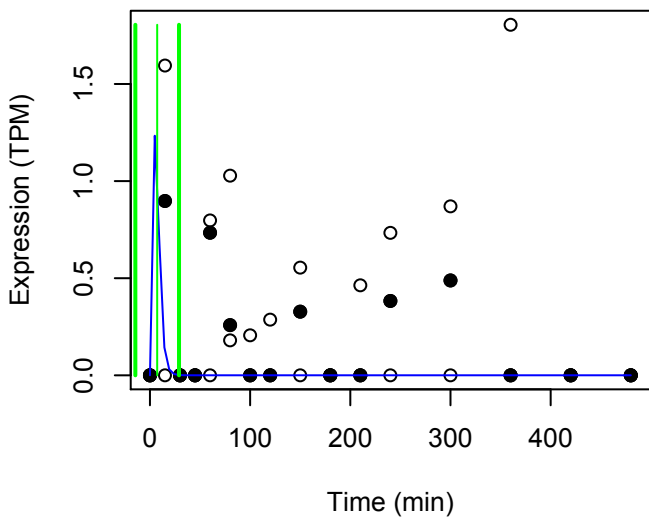

**NEAT1 MCF7-HRG [earlyPeak]**

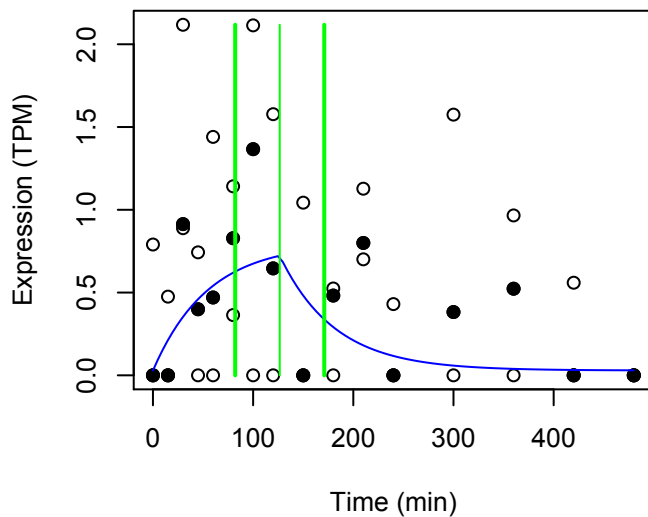

Supplement: pcbi.1004217.s011.pdf [file pcbi.1004217.s011.pdf]
