# Supplementary material for: Transcriptional Dynamics Reveal Critical Roles for Non-coding RNAs in the Immediate-Early Response
Source: PubMed Central journal article supplement (PMC4401570; doi:10.1371/journal.pcbi.1004217), 2015-04-17

**DNaseI protein-coding genes**

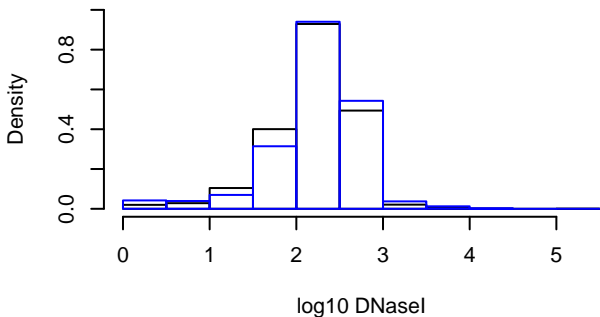

**QQ plot log10 DNaseI**

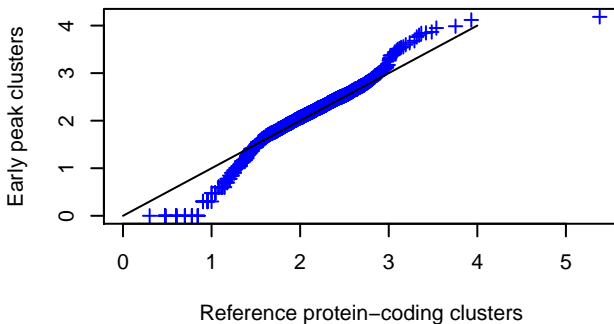

**DNaseI non-coding genes**

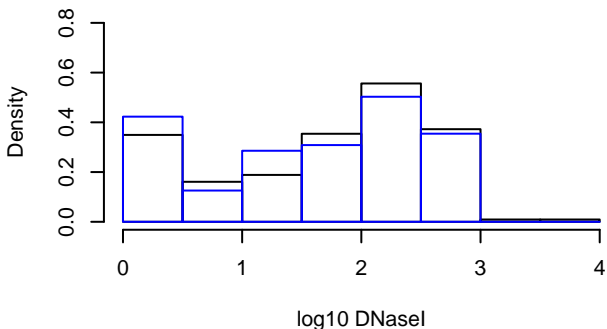

**QQ plot log10 DNaseI**

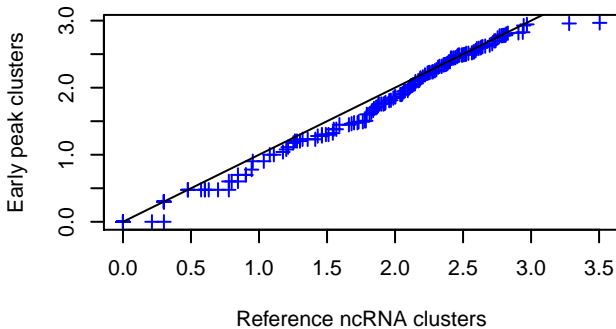

**DNaseI linc RNA**

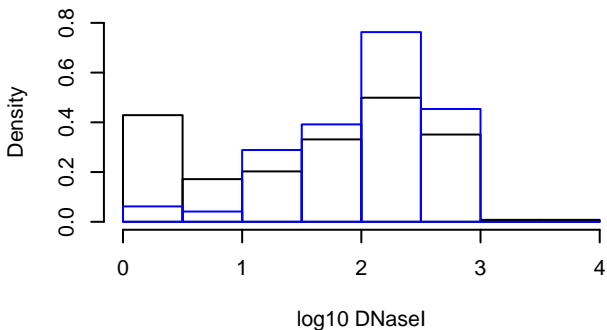

**QQ plot log10 DNaseI**

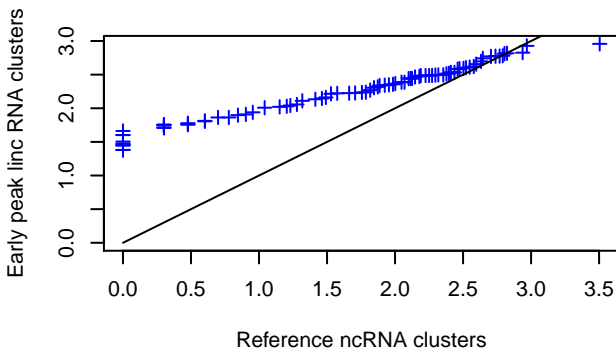

Supplement: pcbi.1004217.s012.pdf [file pcbi.1004217.s012.pdf]
