# Supplementary material for: Transcriptional Dynamics Reveal Critical Roles for Non-coding RNAs in the Immediate-Early Response
Source: PubMed Central journal article supplement (PMC4401570; doi:10.1371/journal.pcbi.1004217), 2015-04-17

**MIR155HG AoSMC-FGF2 [earlyPeak]**

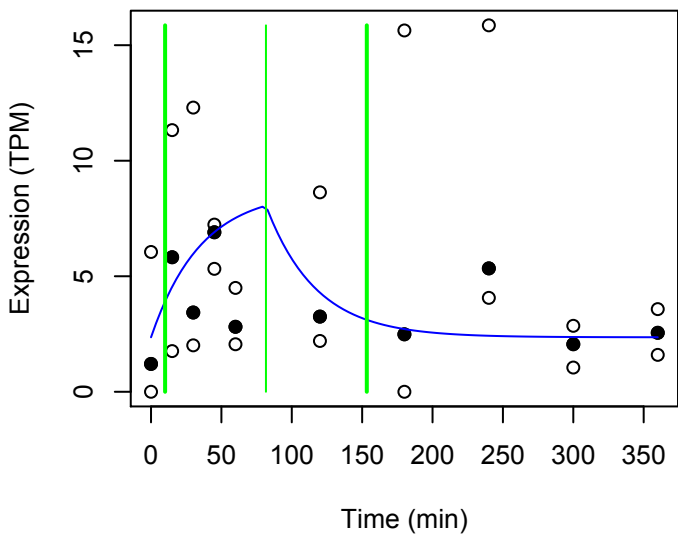

**MIR155HG AoSMC-IL1b [earlyPeak]**

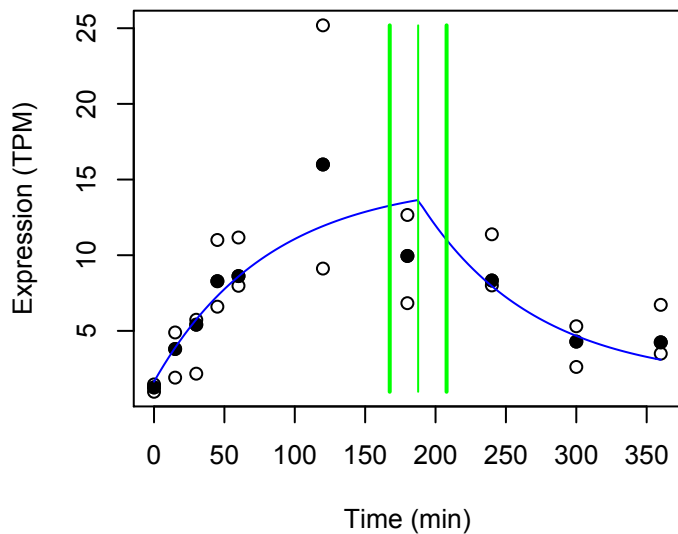

**MIR155HG AoSMC-IL1b [earlyPeak]**

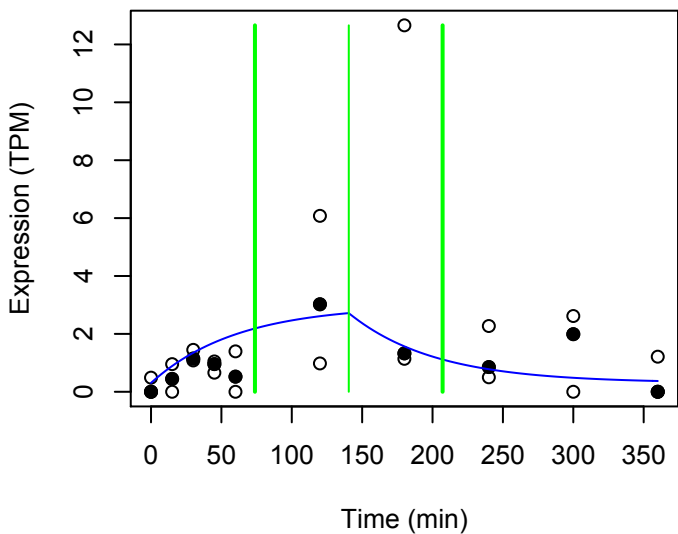

**MIR155HG MCF7-HRG [NODECISION]**

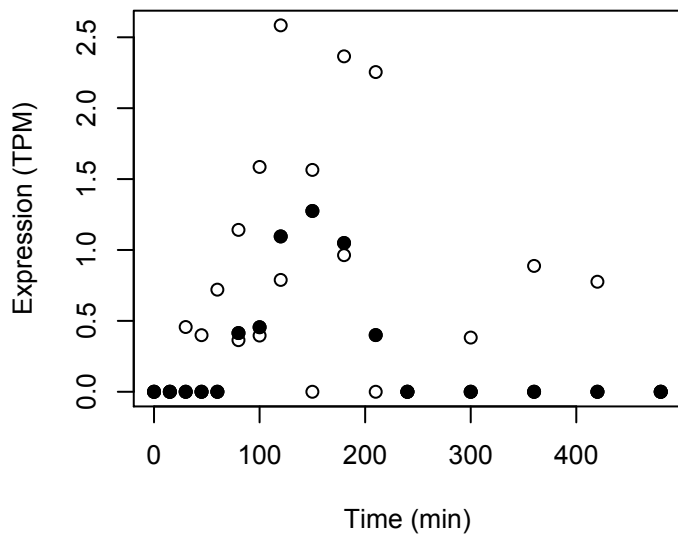

Supplement: pcbi.1004217.s013.pdf [file pcbi.1004217.s013.pdf]
