# Supplementary material for: Transcriptional Dynamics Reveal Critical Roles for Non-coding RNAs in the Immediate-Early Response
Source: PubMed Central journal article supplement (PMC4401570; doi:10.1371/journal.pcbi.1004217), 2015-04-17

Mature hsa-mir-10b [decay]

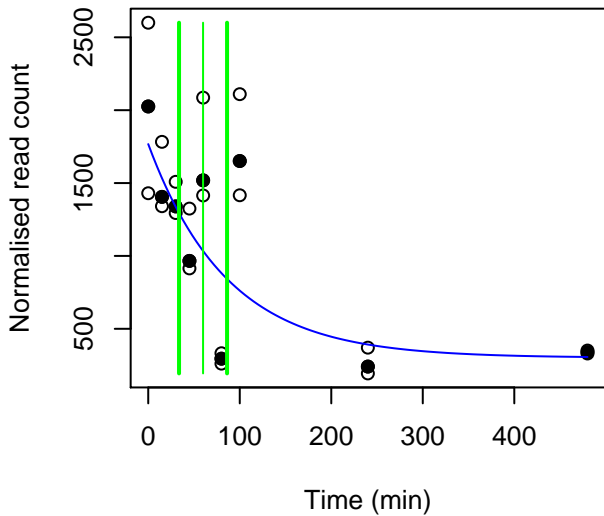

Mature hsa-mir-146a [decay]

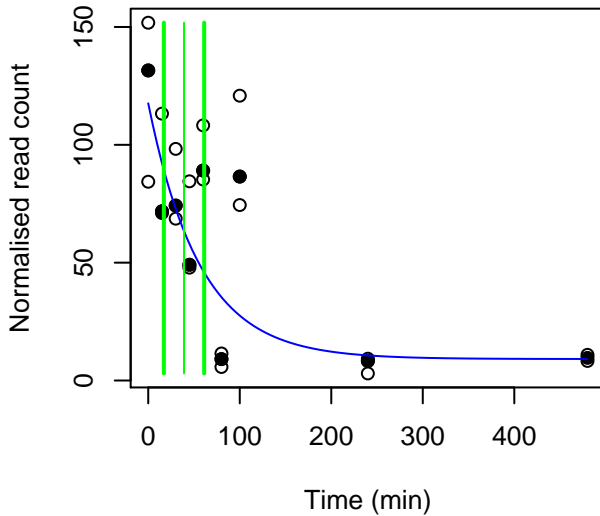

Mature hsa-mir-522 [dip]

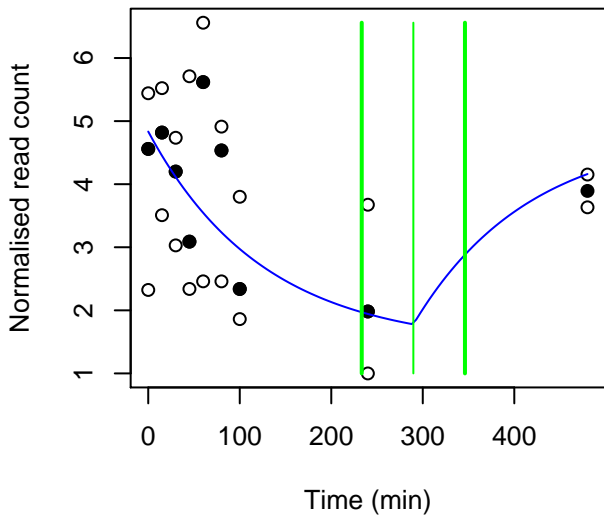

Mature hsa-mir-937 [dip]

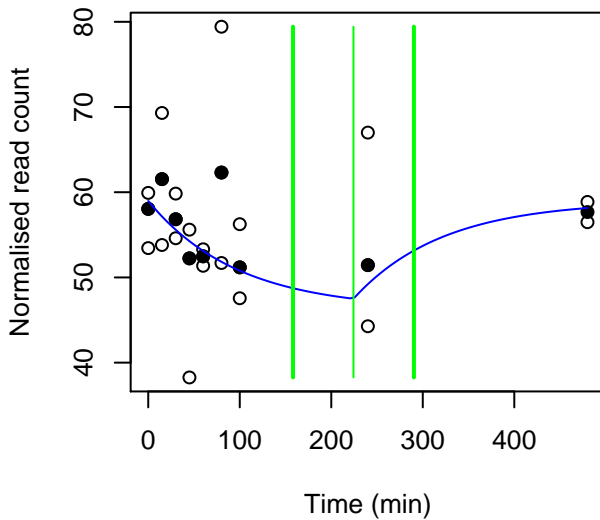

Supplement: pcbi.1004217.s014.pdf [file pcbi.1004217.s014.pdf]
