# Supplementary material for: Transcriptional Dynamics Reveal Critical Roles for Non-coding RNAs in the Immediate-Early Response
Source: PubMed Central journal article supplement (PMC4401570; doi:10.1371/journal.pcbi.1004217), 2015-04-17

**Mature hsa-mir-134 [latePeak NS]**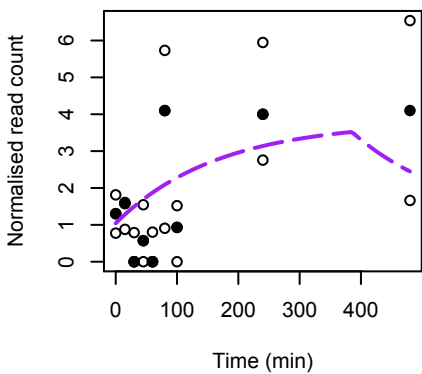**Mature hsa-mir-155 [Ir NS]**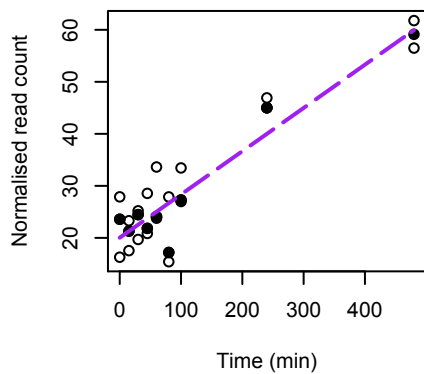**Mature hsa-mir-188 [decay NS]**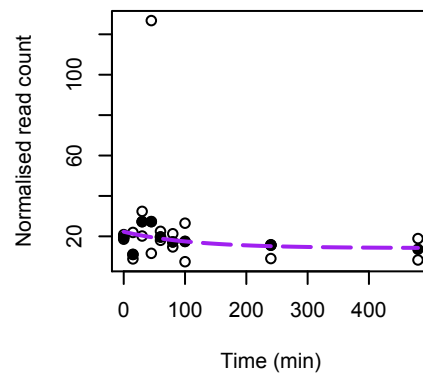**Mature hsa-mir-191 [earlyPeak NS]**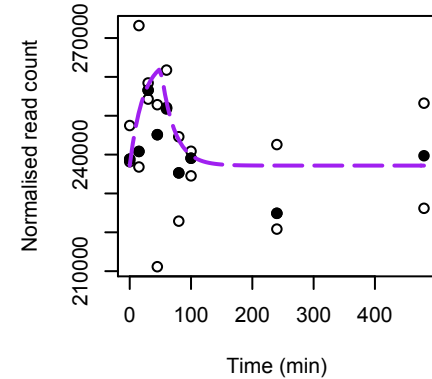**Mature hsa-mir-212 [dip NS]**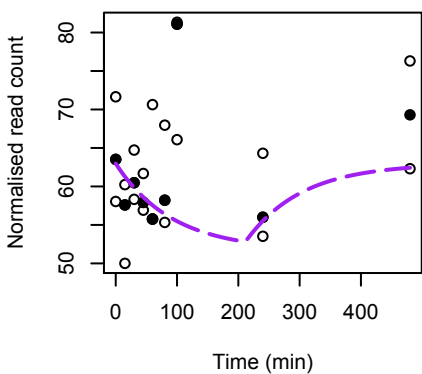**Mature hsa-mir-320a [dip NS]**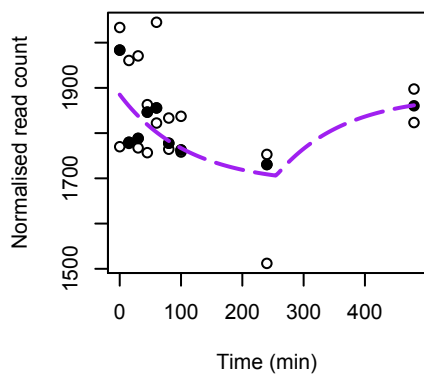**Mature hsa-mir-370 [earlyPeak NS]**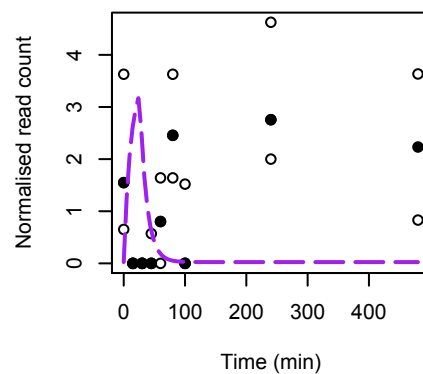**Mature hsa-mir-629 [latePeak NS]**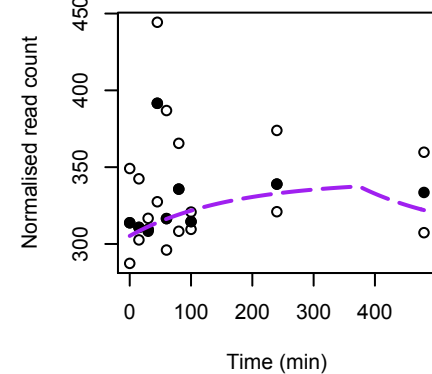**Mature hsa-mir-654 [earlyPeak NS]**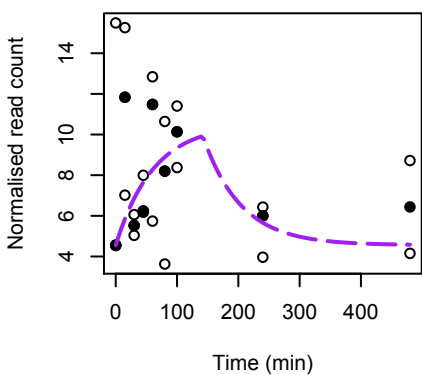**Mature hsa-mir-671 [decay NS]**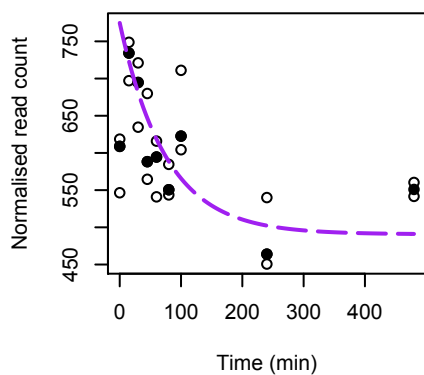**Mature hsa-mir-765 [latePeak NS]**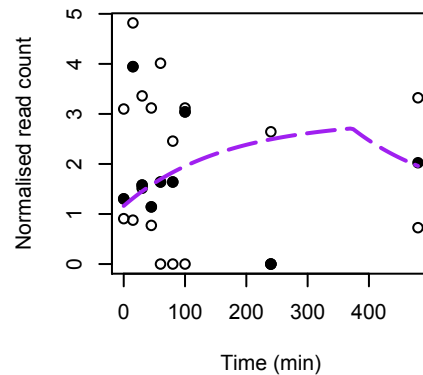

Supplement: pcbi.1004217.s015.pdf [file pcbi.1004217.s015.pdf]
