# Supplementary material for: Transcriptional Dynamics Reveal Critical Roles for Non-coding RNAs in the Immediate-Early Response
Source: PubMed Central journal article supplement (PMC4401570; doi:10.1371/journal.pcbi.1004217), 2015-04-17
Supplement: pcbi.1004217.s017.pdf [file pcbi.1004217.s017.pdf]

| <b>GO Id</b> | <b>Term</b>                                                 | <b>P value</b> | <b>Q value</b> |
|--------------|-------------------------------------------------------------|----------------|----------------|
| GO:0051252   | regulation of RNA metabolic process                         | 6.03E-14       | 5.78E-10       |
| GO:0006355   | regulation of transcription, DNA-templated                  | 4.73E-13       | 2.27E-09       |
| GO:0060255   | regulation of macromolecule metabolic process               | 2.04E-12       | 3.92E-09       |
| GO:0080090   | regulation of primary metabolic process                     | 2.96E-12       | 4.73E-09       |
| GO:0010468   | regulation of gene expression                               | 3.45E-12       | 4.72E-09       |
| GO:2000112   | regulation of cellular macromolecule biosynthetic process   | 1.31E-11       | 1.14E-08       |
| GO:0019222   | regulation of metabolic process                             | 5.56E-11       | 4.44E-08       |
| GO:0006357   | regulation of transcription from RNA polymerase II promoter | 6.90E-08       | 3.48E-05       |
| GO:0090304   | nucleic acid metabolic process                              | 9.38E-08       | 4.29E-05       |
| GO:0016070   | RNA metabolic process                                       | 1.34E-06       | 3.90E-04       |
| GO:0051254   | positive regulation of RNA metabolic process                | 3.71E-06       | 8.28E-04       |
| GO:0044260   | cellular macromolecule metabolic process                    | 1.02E-04       | 1.27E-02       |
| GO:0006139   | nucleobase-containing compound metabolic process            | 1.93E-05       | 3.37E-03       |
| GO:0006725   | cellular aromatic compound metabolic process                | 3.97E-05       | 6.14E-03       |
| GO:0043170   | macromolecule metabolic process                             | 4.45E-05       | 6.47E-03       |
| GO:0046483   | heterocycle metabolic process                               | 5.67E-05       | 7.88E-03       |

The terms listed also have significant p values when all four data sets are considered.
